1                   **Heterologous Vaccination with SARS-CoV-2 Spike saRNA Prime followed**  
2   **by DNA Dual-Antigen Boost Induces Robust Antibody and T-Cell Immunogenicity against**  
3                   **both Wild Type and Delta Spike as well as Nucleocapsid Antigens**

4  
5   Adrian Rice<sup>1φ</sup>, Mohit Verma<sup>1φ</sup>, Emily Voigt<sup>2φ</sup>, Peter Battisti<sup>2</sup>, Sam Beaver<sup>2</sup>, Sierra Reed<sup>2</sup>, Kyle  
6   Dinkins<sup>1</sup>, Shivani Mody<sup>1</sup>, Lise Zakin<sup>1</sup>, Peter Sieling<sup>1</sup>, Shiho Tanaka<sup>1</sup>, Brett Morimoto<sup>1</sup>, Wendy  
7   Higashide<sup>1</sup>, C. Anders Olson<sup>1</sup>, Elizabeth Gabitzsch<sup>1</sup>, Jeffrey T. Safrit<sup>1</sup>, Patricia Spilman<sup>1</sup>, Corey  
8   Casper<sup>2,3</sup>, Patrick Soon-Shiong<sup>1\*</sup>

9  
10   <sup>1</sup>ImmunityBio, Inc., 9920 Jefferson Blvd., Culver City, CA, 90232 USA

11   <sup>2</sup>Infectious Disease Research Institute (IDRI), 1616 Eastlake Ave. East, Seattle, WA, 98102,  
12   USA

13   <sup>3</sup>Departments of Medicine and Global Health, University of Washington, 1959 Pacific Street NE,  
14   Seattle, WA, 98195, USA

15   \*Corresponding author Patrick Soon-Shiong: [Patrick@Nantworks.com](mailto:Patrick@Nantworks.com)

16   <sup>φ</sup>These authors contributed equally

17

18

19

20

21

22

23

24 **ABSTRACT**

25 We assessed if immune responses are enhanced in CD-1 mice by heterologous vaccination  
26 with two different nucleic acid-based COVID-19 vaccines: a next-generation human adenovirus  
27 serotype 5 (hAd5)-vectored dual-antigen spike (S) and nucleocapsid (N) vaccine (AdS+N) and a  
28 self-amplifying and -adjuvanted S RNA vaccine (SASA S) delivered by a nanostructured lipid  
29 carrier. The AdS+N vaccine encodes S modified with a fusion motif to increase cell-surface  
30 expression. The N antigen is modified with an Enhanced T-cell Stimulation Domain (N-ETSD) to  
31 direct N to the endosomal/lysosomal compartment to increase the potential for MHC class I and II  
32 stimulation. The S sequence in the SASA S vaccine comprises the D614G mutation, two prolines  
33 to stabilize S in the prefusion conformation, and 3 glutamines in the furin cleavage region to  
34 increase cross-reactivity across variants. CD-1 mice received vaccination by prime > boost  
35 homologous and heterologous combinations. Humoral responses to S were the highest with any  
36 regimen including the SASA S vaccine, and IgG against wild type S1 and Delta (B.1.617.2) variant  
37 S1 was generated at similar levels. An AdS+N boost of an SASA S prime enhanced both CD4+  
38 and CD8+ T-cell responses to both S wild type and S Delta peptides relative to all other vaccine  
39 regimens. Sera from mice receiving SASA S homologous or heterologous vaccination were found  
40 to be highly neutralizing of all pseudovirus tested: Wuhan, Delta, and Beta strain pseudoviruses.  
41 The findings here support the clinical testing of heterologous vaccination by an SASA S > AdS+N  
42 regimen to provide increased protection against COVID-19 and SARS-CoV-2 variants.

43

44

45

46

## 47 INTRODUCTION

48 Impressive efforts of the scientific and pharmaceutical community have resulted in the design,  
49 testing and successful deployment of several COVID-19 vaccines that have shown high levels of  
50 efficacy.<sup>1-5</sup> Nonetheless, SARS-CoV-2 viral variants have continued to emerge and spread  
51 throughout the globe, particularly in areas where vaccination rates are low or vaccines are  
52 unavailable.

53 To address the need for a vaccine regimen that would be highly efficacious against  
54 predominating and emerging variants that may be made available in currently underserved areas  
55 and nations, and leverages the resilience of cell-mediated immunity against variants, we previously  
56 developed a next-generation human adenovirus serotype 5 (hAd5)-vectored dual-antigen spike (S)  
57 plus nucleocapsid (N) vaccine (AdS+N).<sup>6,7</sup> This vaccine encoding Wuhan strain or ‘wild type’  
58 (wt) SARS-CoV-2 S modified with a fusion sequence (S-Fusion) to enhance cell-surface  
59 expression<sup>6,7</sup> as well as N modified with an Enhanced T-cell Stimulation Domain (N-ETSD)<sup>8</sup> to  
60 increase the potential for MHC class I and II stimulation<sup>9-11</sup> has been shown to elicit humoral and  
61 T-cell responses in mice,<sup>7</sup> non-human primates (NHP),<sup>6</sup> and participants in Phase 1b trials.<sup>8</sup> The  
62 Ad5S+N vaccine given as a subcutaneous (SC) prime with two oral boosts protected NHP from  
63 SARS-CoV-2 infection<sup>6</sup> and a single prime vaccination of clinical trial participants generated T-  
64 cell responses that were sustained against a series of variant S peptide sequences, including those  
65 for the B.1.351, B.1.1.7, P.1, and B.1.426 variants.<sup>8</sup>

66 Despite the promising findings with the AdS+N vaccine candidate, we wish to continue to  
67 investigate vaccine regimens with the potential to maximize immune responses – both humoral  
68 and cellular. One such approach is by heterologous vaccination utilizing two nucleic acid-based  
69 vaccines: ImmunityBio’s hAd5 vectored DNA vaccine and the Infectious Disease Research

70 Institute's (IDRI's) RNA-based vaccine.<sup>12</sup> Heterologous vaccination using vaccine constructs  
71 expressing the same or different antigens vectored by different platforms, specifically  
72 combinations of RNA- and adenovirus-based vaccines has previously been reported to  
73 significantly increase immune responses.<sup>13,14</sup>

74 To assess the potential for enhanced immune responses by heterologous vaccination, we tested  
75 prime > boost combinations of the AdS+N vaccine with a self-amplifying and self-adjuvanted  
76 S(wt) RNA-based vaccine (SASA S) delivered in a nanostructured lipid carrier (NLC).<sup>15,16</sup> The  
77 NLC stabilizes the self-amplifying RNA<sup>17-19</sup> and delivers it to cells wherein it is amplified and the  
78 S protein expressed. The S sequence in the SASA S vaccine comprises a codon-optimized  
79 sequence with the D614G mutation<sup>20</sup> that increases SARS-CoV-2 susceptibility to neutralization,  
80<sup>21</sup> a diproline modification to stabilize S in the pre-fusion conformation that increases antigenicity,  
81<sup>22</sup> and a tri-glutamine (3Q) repeat in the furin cleavage region to broaden immune responses against  
82 variants.<sup>23</sup> Preclinical studies of the SASA S vaccine have demonstrated the vaccine elicited  
83 vigorous antigen-specific and virus-neutralizing IgG and polyfunctional CD4+ and CD8+ T-cell  
84 responses after both a prime and boost in C57Bl/6 mice.

85 In this work, the two aforementioned vaccines were tested by homologous prime > boost  
86 delivery of each as compared to heterologous delivery regimens with an alternating order: AdS+N  
87 > SASA S and SASA S > AdS+N. The findings reported here support our hypothesis that  
88 heterologous vaccination with the SASA S and AdS+N vaccines would enhance immune  
89 responses, particularly T-cell responses.

90 Both CD4+ and CD8+ T-cell responses were enhanced by heterologous vaccination, with  
91 CD4+ interferon- $\gamma$  (IFN- $\gamma$ ) production in response to both S(wt) peptides being higher with the  
92 SASA S prime > AdS+N boost combination as compared to all other groups. Notably, CD4+ and

93 CD8<sup>+</sup> T cells were equally responsive to S(wt) and S(Delta) peptides and responses of T cells  
94 from SASA S > AdS+N to S(Delta) were also the highest of the groups.

95 Findings were similar for unselected T cells in ELISpot analyses, which again revealed the  
96 SASA S > AdS+N combination resulted in significantly higher IFN- $\gamma$  secretion by T cells in  
97 response to both S(wt) peptides than all other groups.

98 We further demonstrate that all combinations that included the SASA S vaccine elicited the  
99 greatest anti-full length (FL) S wild type (wt), anti-S1(wt) and – importantly- anti-Delta variant  
100 (B.1.617.2) S1 IgG responses. Regimens comprising the SASA S vaccine also generated sera that  
101 showed high and similar capability to neutralize Wuhan, Delta, and Beta strain pseudovirus.

102 As expected, anti-N IgG antibodies and T-cell responses to N peptides were seen only for  
103 vaccine combinations that delivered the N antigen and were very similar among groups receiving  
104 the AdS+N vaccine in any order.

## 105 **METHODS**

### 106 *The hAd5 [E1-, E2b-, E3-] platform and constructs*

107 For studies here, the next generation hAd5 [E1-, E2b-, E3-] vector was used to create viral  
108 vaccine candidate constructs. <sup>6</sup> This hAd5 [E1-, E2b-, E3-] vector is primarily distinguished from  
109 other first-generation [E1-, E3-] recombinant Ad5 platforms <sup>24,25</sup> by having additional deletions in  
110 the early gene 2b (E2b) region that remove the expression of the viral DNA polymerase (pol) and  
111 in pre terminal protein (pTP) genes, and its propagation in the E.C7 human cell line. <sup>26-29</sup>

112 The AdS+N vaccine expresses a wild type spike (S) sequence [accession number  
113 YP009724390] modified with a proprietary ‘fusion’ linker peptide sequence as well as a wild type  
114 nucleocapsid (N) sequence [accession number YP009724397] with an Enhanced T-cell

115 Stimulation Domain (ETSD) signal sequence to direct translated N to the endosomal/lysosomal  
116 pathway<sup>8</sup> as described in Gabitzsch *et al.*, 2021.<sup>6</sup>

117 The SASA S vaccine comprises an saRNA replicon composed of an 11.7 kb construct  
118 expressing the SARS-CoV-2 Spike protein, along with the non-structural proteins 1-4 derived from  
119 the Venezuelan equine encephalitis virus (VEEV) vaccine strain TC-83. The Spike RNA sequence  
120 is codon-optimized and expresses a protein with the native sequence of the original Wuhan strain  
121 plus the dominant D614G mutation, with the prefusion conformation-stabilizing diproline (pp)  
122 mutation (consistent with other vaccine antigens) and replacement of the furin cleavage site RRAR  
123 sequence with a QQAQ sequence, as shown in Figure 1.

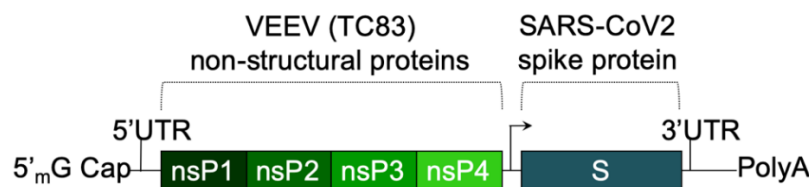

124  
125

126 **Fig. 1** The saRNA(D614G)-2P-3Q-NLC (SASA S) vaccine. The SASA S vaccine comprises an  
127 saRNA replicon backbone consisting of the non-structural protein (nsPs) 1-4 derived from the  
128 Venezuelan equine encephalitis virus (VEEV) vaccine strain TC-83 and an independent open  
129 reading frame under the control of a subgenomic promoter sequence that contains Wuhan sequence  
130 S with a diproline (pp) mutation and a QQAQ furin cleavage site sequence.

131

132 The RNA is generated by T7 promoter-mediated *in vitro* transcription using a linearized DNA  
133 template. *In vitro* transcription is performed using an in house-optimized protocol<sup>12,30,31</sup> using T7  
134 polymerase, RNase inhibitor, and pyrophosphatase enzymes. DNA plasmid is digested with  
135 DNase I and the RNA is capped by vaccinia capping enzyme, guanosine triphosphate, and S-  
136 adenosyl-methionine. RNA is then purified from the transcription and capping reaction  
137 components by chromatography using a CaptoCore 700 resin (GE Healthcare) followed by  
138 diafiltration and concentration using tangential flow filtration into 10 mM Tris buffer. The RNA  
139 material is terminally filtered with a 0.22  $\mu$ m polyethersulfone filter and stored at -80°C until use.

140 The RNA-stabilizing nanostructured lipid carrier (NLC) is comprised of particles with a  
 141 hybrid liquid and solid oil core, which provides colloidal stability<sup>32</sup> Non-ionic hydrophobic and  
 142 hydrophilic surfactants help maintain a stable nanoparticle droplet, while a cationic lipid provides  
 143 the positive charge for electrostatic binding of RNA. That binding on the surface of the  
 144 nanoparticles protects RNA from degradation by RNases and allowing delivery to cells that will  
 145 express the S antigen.

146 NLC is manufactured by mixing the lipids in an oil phase, dissolving the Tween 80 in citrate  
 147 buffer aqueous phase, and homogenizing the two phases by micro-fluidization. The resulting  
 148 emulsion is sterile-filtered and vialled, and reconstituted in an appropriate buffer before use.

149 *Murine immunization and blood/tissue collection*

150 The design of vaccination study performed using CD-1 mice is shown in Figure 2.

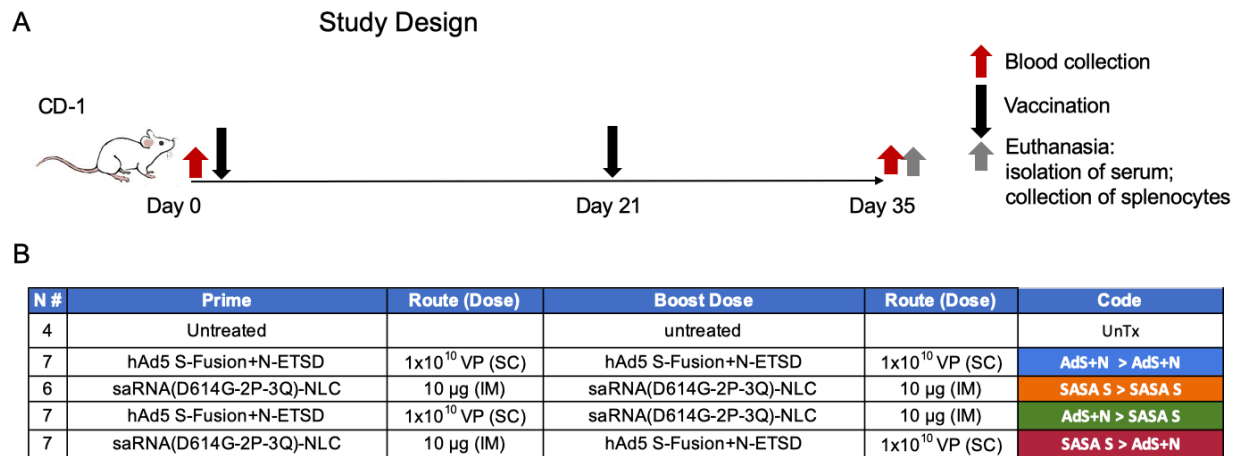

151 **Fig. 2** Study design and vaccine description. (A) CD-1 mice received prime vaccination on Day 0  
 152 after blood collection and the boost on Day 21; mice were euthanized and tissues/blood collected  
 153 on Day 35. (B) The various combinations of prime > boost are shown, including: AdS+N  
 154 homologous; saRNA(D614G-2P-3Q)-NLC (SASA S) homologous; Ad5S+N prime, SASA S  
 155 boost; and SASA S prime, AdS+N boost. Untreated mice were used as controls. All were n = 7  
 156 with the exception of untreated n = 4 and SASA S homologous n = 6. The color code for each  
 157 group is shown.  
 158  
 159

160 All *in vivo* experiments described were carried out in strict accordance with good animal  
161 practice according to NIH recommendations. All procedures for animal use were approved by the  
162 IACUC Committee at Omeros, Inc. (Seattle, WA, USA) and under an approved protocol.

163 CD-1 female mice (Charles River Laboratories) 6-8 weeks of age were used for  
164 immunological studies performed at the vivarium facilities of Omeros Inc. (Seattle, WA). The  
165 adenovirus-vectored vaccines were administered by subcutaneous (SC) injections at the indicated  
166 doses in 50  $\mu$ L ARM buffer (20 mM Tris pH 8.0, 25 mM NaCl, with 2.5% glycerol). The SASA  
167 S vaccine was administered intramuscularly (IM) in 10% sucrose 5 mM sodium citrate solution at  
168 a dose of 10  $\mu$ g.

169 On the final day of each study, blood was collected via the submandibular vein from  
170 isoflurane-anesthetized mice for isolation of sera using a microtainer tube and then mice were  
171 euthanized for collection of spleens. Spleens were removed from each mouse and placed in 5 mL  
172 of sterile media (RPMI/HEPES/Pen/Strep/10% FBS). Splenocytes were isolated<sup>33</sup> within 2 hours  
173 of collection and used fresh or frozen for later analysis.

#### 174 *Intracellular cytokine stimulation (ICS)*

175 ICS assays were performed using 10<sup>6</sup> live splenocytes per well in 96-well U-bottom plates.  
176 Splenocytes in RPMI media supplemented with 10% FBS were stimulated by the addition of pools  
177 of overlapping peptides spanning the SARS-CoV-2 S protein (both wild type, wt, or Delta  
178 sequence) or N antigens at 2  $\mu$ g/mL/peptide for 6 h at 37°C in 5% CO<sub>2</sub>, with protein transport  
179 inhibitor, GolgiStop (BD) added two hours after initiation of incubation. The S peptide pool (wild  
180 type, JPT Cat #PM-WCPV-S-1; Delta, JPT cat# PM-SARS2-SMUT06-1) is a total of 315 spike  
181 peptides split into two pools, S1 and S2, comprised of 158 and 157 peptides each. The N peptide  
182 pool (JPT; Cat # PM-WCPV-NCAP-1) was also used to stimulate cells. A SIV-Nef peptide pool



183 (BEI Resources) was used as an off-target negative control. Stimulated splenocytes were then  
184 stained with a fixable cell viability stain (eBioscience™ Fixable Viability Dye eFluor™ 506 Cat#  
185 65-0866-14) followed by the lymphocyte surface markers CD8β and CD4, fixed with CytoFix  
186 (BD), permeabilized, and stained for intracellular accumulation of IFN-γ, TNF-α and IL-2.  
187 Fluorescent-conjugated anti-mouse antibodies used for labeling included CD8β antibody (clone  
188 H35-17.2, ThermoFisher), CD4 (clone RM4-5, BD), IFN-γ (clone XMG1.2, BD), TNF-α (clone  
189 MP6-XT22, BD) and IL-2 (clone JES6-5H4; BD), and staining was performed in the presence of  
190 unlabeled anti-CD16/CD32 antibody (clone 2.4G2; BD). Flow cytometry was performed using a  
191 Beckman-Coulter Cytotflex S flow cytometer and analyzed using Flowjo Software.

#### 192 *ELISpot assay*

193 ELISpot assays were used to detect cytokines secreted by splenocytes from inoculated mice.  
194 Fresh splenocytes were used on the same day as harvest, and cryopreserved splenocytes containing  
195 lymphocytes were used the day of thawing. The cells ( $2-4 \times 10^5$  cells per well of a 96-well plate)  
196 were added to the ELISpot plate containing an immobilized primary antibody to either IFN-γ or  
197 IL-4 (BD Cat# 551881 and BD Cat# 551878, respectively), and were exposed to various stimuli  
198 (e.g. control peptides SIV and ConA, S-WT and N peptides pools – see catalog numbers above) at  
199 a concentration of 1-2 μg/mL peptide pools for 36-40 hours. After aspiration and washing to  
200 remove cells and media, extracellular cytokine was detected by a biotin-conjugated secondary  
201 antibody to cytokine conjugated to biotin (BD), followed by a streptavidin/horseradish peroxidase  
202 conjugate was used detect the biotin-conjugated secondary antibody. The number of spots per well,  
203 or per  $2-4 \times 10^5$  cells, was counted using an ELISpot plate reader. Quantification of Th1/Th2 bias  
204 was calculated by dividing the IFN-γ spot forming cells (SFC) per million splenocytes with the  
205 IL-4 SFC per million splenocytes for each animal.

206 *ELISA for detection of antibodies*

207 For IgG antibody detection in inoculated mouse sera and lung homogenates, ELISAs for  
208 spike-binding (including S1 Delta) and nucleocapsid-binding antibodies and IgG subclasses  
209 (IgG1, IgG2a, IgG2b, and IgG3) were used. A microtiter plate was coated overnight with 100 ng  
210 of either purified recombinant SARS-CoV-2 S-FTD (FL S with fibrin trimerization domain,  
211 constructed and purified in-house by ImmunityBio), purified recombinant Spike S1 domain  
212 (S1(wt)) (Sino; Cat # 40591-V08B1), purified recombinant Delta variant Spike S1 domain  
213 (S1(Delta)) (Sino; Cat # 40591-V08H23), or purified recombinant SARS-CoV-2 nucleocapsid (N)  
214 protein (Sino; Cat # 40588-V08B) in 100  $\mu$ L of coating buffer (0.05 M Carbonate Buffer, pH 9.6).  
215 The wells were washed three times with 250  $\mu$ L PBS containing 1% Tween 20 (PBST) to remove  
216 unbound protein and the plate was blocked for 60 minutes at room temperature with 250  $\mu$ L PBST.  
217 After blocking, the wells were washed with PBST, 100  $\mu$ L of either diluted serum or diluted lung  
218 homogenate samples was added to each well, and samples incubated for 60 minutes at room  
219 temperature. After incubation, the wells were washed with PBST and 100  $\mu$ L of a 1/5000 dilution  
220 of anti-mouse IgG HRP (GE Health Care; Cat # NA9310V), anti-mouse IgG<sub>1</sub> HRP (Sigma; Cat #  
221 SAB3701171), anti-mouse IgG<sub>2a</sub> HRP (Sigma; Cat # SAB3701178), anti-mouse IgG<sub>2b</sub> HRP  
222 (Sigma; catalog# SAB3701185), anti-mouse IgG<sub>3</sub> HRP conjugated antibody (Sigma; Cat #  
223 SAB3701192), or anti-mouse IgA HRP conjugated antibody (Sigma; Cat # A4789) was added to  
224 wells. For positive controls, 100  $\mu$ L of a 1/5000 dilution of rabbit anti-N IgG Ab or 100  $\mu$ L of a  
225 1/25 dilution of mouse anti-S serum (from mice immunized with purified S antigen in adjuvant)  
226 were added to appropriate wells. After incubation at room temperature for 1 hour, the wells were  
227 washed with PBS-T and incubated with 200  $\mu$ L o-phenylenediamine-dihydrochloride (OPD  
228 substrate (Thermo Scientific Cat # A34006) until appropriate color development. The color

229 reaction was stopped with addition of 50  $\mu$ L 10% phosphoric acid solution (Fisher Cat # A260-  
230 500) in water and the absorbance at 490 nm was determined using a microplate reader (SoftMax  
231 Pro, Molecular Devices).

#### 232 *Calculation of relative ng amounts of antibodies and the Th1/Th2 IgG subclass bias*

233 A standard curve of IgG for OD vs. ng mouse IgG was generated using purified mouse IgG  
234 (Sigma Cat #15381; absorbance values were converted into mass equivalents for both anti-S and  
235 anti-N antibodies. Using these values, we calculated the geometric mean value for S- and N-  
236 specific IgG per milliliter of serum induced by vaccination. These values were also used to quantify  
237 the Th1/Th2 bias for the humoral responses by dividing the sum total of Th1 biased antigen-  
238 specific IgG subclasses (IgG2a, IgG2b and IgG3) with the total Th2 skewed IgG3, for each mouse.  
239 For mice that lack anti-S and/or anti-N specific IgG responses, Th1/Th2 ratio was not calculated.  
240 Conversely, some responses, particularly for anti-N responses in IgG2a and IgG2b (both Th1  
241 biased subclasses), were above the limit of quantification with OD values higher than those  
242 observed in the standard curve. These data points were reduced to values within the standard curve,  
243 and thus will reflect a lower Th1/Th2 bias than would otherwise be reported.

#### 244 *Endpoint titers*

245 Serial dilutions were prepared from each serum sample, with dilution factors ranging from  
246 400 to 6,553,600 in 4-fold steps. These dilution series were characterized by whole IgG ELISA  
247 assays against both recombinant S1(wt) and recombinant S1(Delta), as described above. Half  
248 maximal response values ( $Ab_{50}$ ) were calculated by non-linear least squares fit analysis on the  
249 values for each dilution series against each recombinant S1 in GraphPad Prism. Serum samples  
250 from mice without anti-S responses were removed  $Ab_{50}$ ,  $\mu$ g IgG/mL sera, and endpoint titer  
251 analyses and reported as N/D on the graphs. Endpoint titers were defined as the last dilution with

252 an absorbance value at least 3 standard deviations higher than the standard deviation of all readings  
253 from serum of untreated animals (n = 32 total negative samples). Quantitative titration values ( $\mu\text{g}$   
254 IgG/mL sera) were calculated against a standard curve as described above.

#### 255 *Pseudovirus neutralization assay*

256 SARS-CoV-2 pseudovirus neutralization assays were conducted on immunized mouse serum  
257 samples using procedures adapted from Crawford *et al.*, 2020.<sup>34</sup> In brief, lentiviral pseudoviruses  
258 expressing SARS-CoV-2 spike protein variants were prepared by co-transfecting HEK293 cells  
259 (ATCC CRL-3216) with a plasmid containing a lentiviral backbone expressing luciferase and  
260 ZsGreen (BEI Resources NR-52516), plasmids containing lentiviral helper genes (BEI Resources  
261 NR-52517, NR-52518, NR-52519), and a delta19 cytoplasmic tail-truncated SARS-CoV-2 spike  
262 protein expression plasmid (Wuhan strain, B.1.1.7, and B.1.351 spike variant plasmids were a gift  
263 from Jesse Bloom of Fred Hutchinson Cancer Research Center; B.1.617.2 “delta” variant plasmid  
264 a gift from Thomas Peacock of Imperial College London). Pseudovirus stocks were harvested from  
265 the cell culture media after 72 hours of incubation at 37°C, 5% CO<sub>2</sub>, filtered through a 0.2  $\mu\text{m}$   
266 filter, and frozen until use.

267 Mouse serum samples were diluted 1:10 in media (Gibco DMEM + GlutaMAX + 10% FBS)  
268 and then serially diluted 1:2 for 11 total dilutions, and incubated with polybrene (Sigma) and  
269 pseudovirus for 1 hour at room temperature. Serum-virus mix was then added in duplicate to  
270 seeded hACE2 expressing HEK293 cells (BEI Resources) and incubated at 37°C, 5% CO<sub>2</sub> for 72  
271 hours. To determine 50% inhibitory concentration (IC<sub>50</sub>) values, plates were scanned on a high  
272 content fluorescent imager (Molecular Devices ImageXpress Pico) for ZsGreen expression. Total  
273 integrated intensity per well was used to calculate % pseudovirus inhibition noted in each well.

274 Neutralization curves were fit with a four-parameter sigmoidal curve which was used to calculate  
275 IC50 values.

### 276 *Statistical analyses and graph generation*

277 All statistical analyses were performed and graphs generated used in figures were generated  
278 using GraphPad Prism software. Statistical tests for each graph are described in the figure legends.  
279 Statistical analyses of Endpoint Titer for anti-S1 IgG (Figure 4) was performed by assignment of  
280 a value of 200 – one half the Level of Detection (LOD) of 400 – to the 4 animals with serum values  
281 below the LOD.

## 282 **RESULTS**

### 283 **The SASA S vaccine enhanced generation of anti-S(wt) IgG**

284 Mice receiving the SASA S vaccine in any homologous or heterologous vaccination regimen  
285 had the highest levels of anti-full length S(wt) (FL S) IgG2a and 2b as determined by OD at 490  
286 nm in ELISA (Fig. 3A). As expected, only mice receiving the N antigen generated anti-N IgG  
287 (also determined by OD at 490 nm in ELISA), which was similar for all groups receiving an N-  
288 containing antigen (Fig. 3B) by AdS+ N homologous, prime, or boost vaccination. Determination  
289 of the IgG1/IgG2a + IgG2b + IgG3 ratio using ng amounts calculated from the OD reading (see  
290 *Methods*) revealed responses were highly T helper cell 1 (Th1)-biased, with all calculated values  
291 being greater than one (Fig. 3C).

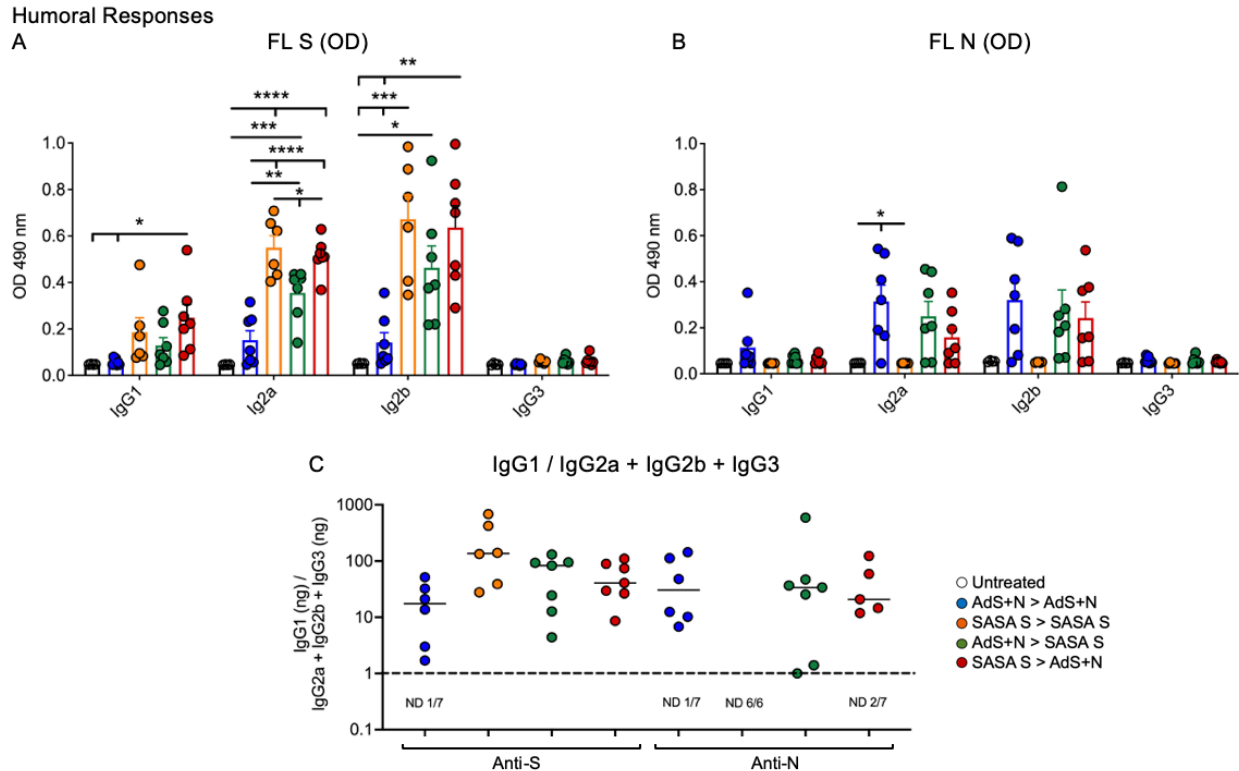

292  
 293 **Fig. 3** Anti-full length (FL) spike wild type (Swt) and -nucleocapsid (N) IgG antibody levels in sera  
 294 show T helper cell 1 (Th1) bias. (A) Levels of anti-FL Swt and (B) anti-N IgG1, IgG2a, IgG2b and  
 295 IgG3 subtypes represented by OD at 490 nm from ELISA of sera are shown. Statistical analyses  
 296 performed using one-way ANOVA and Tukey's post-hoc comparison of all groups to all other  
 297 groups with the exception of comparison to the SASA S > group t SASA S hat did not receive an  
 298 N antigen for anti-N IgG; where \* $p \leq 0.05$ , \*\* $p < 0.01$ , \*\*\* $p < 0.001$ , and \*\*\*\* $p < 0.0001$ . (C) The  
 299 IgG1/IgG2a+IgG2b+IgG3 ratio calculated using the ng equivalents for each is shown with a  
 300 dashed line at 1. Values > 1 reflect Th1 bias. The number (n) of animals in which the ratio was not  
 301 determined due to very low antibody levels is shown below the x-axis for each group. The  
 302 homologous SASA S group did not receive an N antigen. Data graphed as the mean and SEM.  
 303 The legend in C applies to all figure panels.

304  
 305 **Humoral responses against wildtype and Delta S1 were similar in all SASA S groups**

306 To assess serum antibody production specific for delta B.1.617.2 variant as compared to  
 307 wild type S, an ELISAs were performed using either the wt or B.1.617.2 sequence S1 domain of  
 308 S, which contains the RBD.

309 Vaccine regimens including the SASA S vaccine elicited the highest anti-S1(wt) and  
 310 S1(Delta) responses as represented by the Ab<sub>50</sub>,  $\mu\text{g IgG/mL}$ , and endpoint titers (Fig. 4A, B, and  
 311 C, respectively). Four of seven AdS+N homologous vaccinated mice had serum IgG levels against

312 these antigens that were below the level of detection. Overall, the mean antibody titers for SASA  
313 S homologous and SASA S > AdS+N groups were highest. For Ab<sub>50</sub> and µg IgG/mL (Fig. A and  
314 B) statistical comparison of the AdS+N group to other groups was not performed because of the  
315 presence of values below the LOD in the AdS+N group. For endpoint titer (Fig. 4C), the only  
316 significant difference was observed between AdS+N homologous versus SASA S homologous  
317 vaccination for anti-S1(delta) IgG, with the caveat that for this statistical analysis, serum values of  
318 200 for those animals with IgG below the LOD of 400 were used.

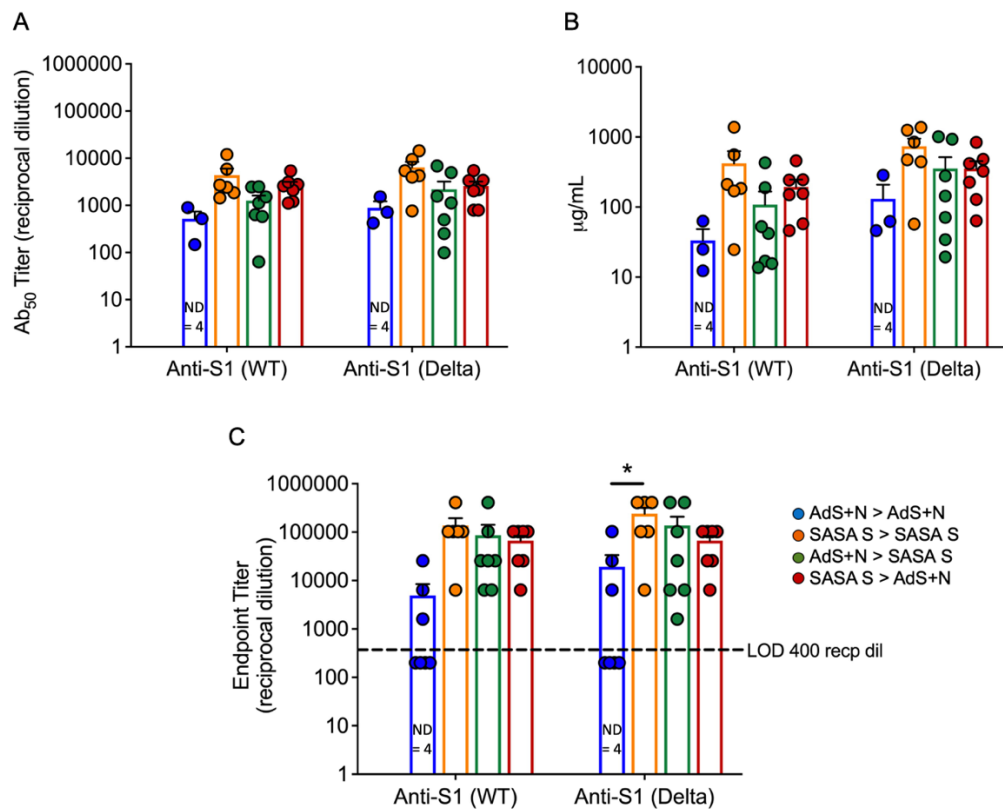

319 **Fig. 4** Wildtype and B.1.617.2 'Delta' S1-specific IgG endpoint titers. Levels of anti-S1(wt) and -  
320 Delta S1 IgG are shown by (A) Ab<sub>50</sub> reciprocal dilution, (B) µg/mL sera, and (C) endpoint titer  
321 reciprocal dilution. Values were below the level of detection in 4 of 7 AdS+N homologous group  
322 mice. Statistical analyses performed using one-way ANOVA and Tukey's post-hoc comparison of  
323 all groups for anti-S1 (WT) or -S1 (Delta) for (C) only where \* p = 0.0333; sera without detectable  
324 levels of anti-S1 IgG were assigned a value of 200, one-half the Limit of Detection (LOD) of 400.  
325 Data graphed as the mean and SEM. The legend in C applies to all figure panels.  
326  
327

328

329 **An AdS+N boost after SASA S prime vaccination enhances CD4+ and CD8+ T cell responses**

330 Significantly higher percentages of CD4+ T-cells from SASA S > AdS+N group mice secreted  
331 IFN- $\gamma$  alone, IFN- $\gamma$  and tumor necrosis factor- $\alpha$  (TNF- $\alpha$ ), or IFN- $\gamma$ , TNF- $\alpha$ , and interleukin-2 (IL-  
332 2) as detected by intracellular cytokine staining (ICS) in response to S(wt) peptides as compared  
333 to both the AdS+N or SASA S homologous groups (Fig. 5A, C, and D). Additionally, the mean  
334 percentages were significantly higher than that of the AdS+ N > SASA S group.

335 The enhancement of cytokine production by AdS+N boost of an SASA S prime was even  
336 more pronounced for CD8+ T cells (Fig. 5B, D, and F). Cytokine production was significantly  
337 higher in the SASA S > AdS+N group compared to both the homologous vaccination groups as  
338 well as the AdS+N > SASA S group.

339 As expected, only T cells from mice receiving vaccination regimens that included delivery of  
340 the N antigen by the AdS+N vaccine produced cytokines in response to N peptide stimulation.  
341 Mean responses of both CD4+ and CD8+ T cells to N peptides were similar for groups receiving  
342 AdS+N as a boost, either as part of homologous or heterologous vaccination (Figure 5A-F).



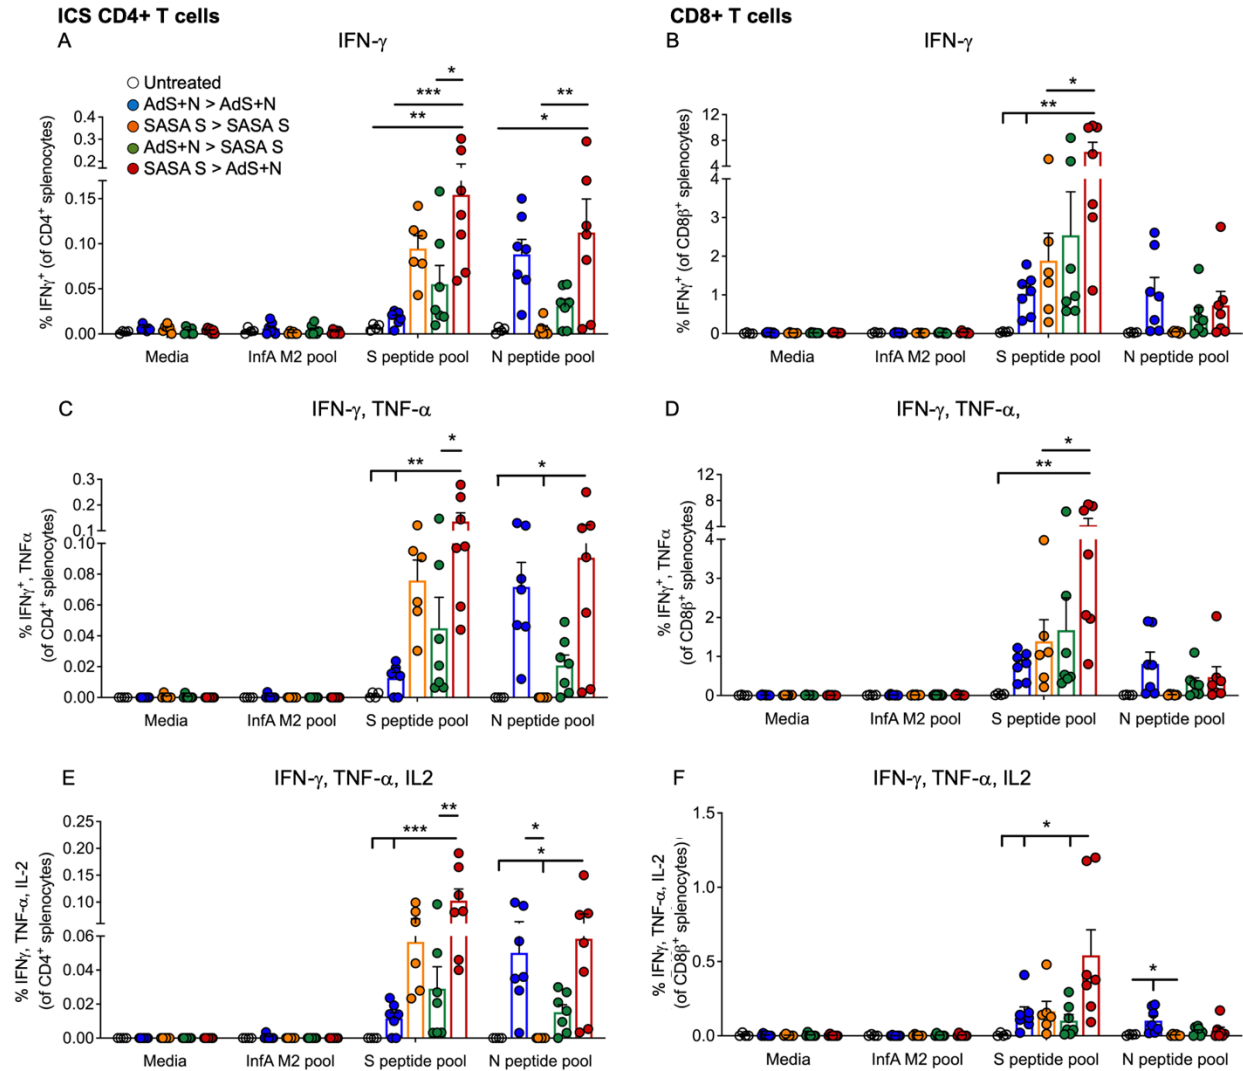

343  
 344 **Fig. 5** CD4<sup>+</sup> and CD8<sup>+</sup> T cell Intracellular cytokine staining (ICS) in response to S(wt) and N  
 345 peptides. (A, B) ICS for interferon- $\gamma$  (IFN- $\gamma$ ), (C, D) IFN- $\gamma$  and tumor necrosis factor- $\alpha$  (TNF- $\alpha$ ),  
 346 and (E, F) IFN- $\gamma$ , TNF- $\alpha$  and interleukin-2 (IL-2) are shown for CD4<sup>+</sup> and CD8<sup>+</sup> T cells,  
 347 respectively. Statistical analyses performed using one-way ANOVA and Tukey's post-hoc  
 348 comparison of all groups to all other groups with the exception of comparison to the SASA S >  
 349 SASA S group that did not receive an N antigen (comparisons to UnTx > UnTx are shown); where  
 350 \* $p \leq 0.05$ , \*\* $p < 0.01$ , and \*\*\* $p < 0.001$ . Data graphed as the mean and SEM. The legend in A  
 351 applies to all figure panels.

352  
 353 **CD4<sup>+</sup> and CD8<sup>+</sup> T-cell production of IFN- $\gamma$  was similar in response to either S(wt) or**

354 **S(Delta) peptides**

355 CD4<sup>+</sup> and CD8<sup>+</sup> T cells show similar levels of IFN- $\gamma$  production in ICS in response to either

356 S(wt) or S(Delta) sequence peptides (Fig. 6A and B, respectively). Patterns of CD4<sup>+</sup> and CD8<sup>+</sup>

357 T-cell stimulation by S protein peptides between the vaccination regimens were also similar  
358 between the S(wt) and S(Delta) peptides. Compared to the untreated control, the significance of  
359 the increase in IFN- $\gamma$  production was again the highest for the SASA S > AdS+N group for both  
360 CD4+ and CD8+ T cells, and in response to either S(wt) or S(Delta) peptides.

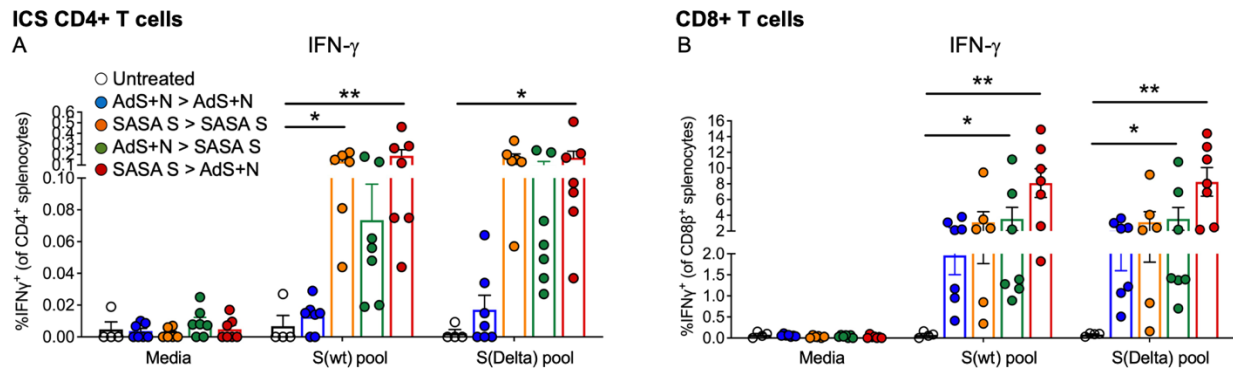

361  
362 **Fig. 6** CD4+ and CD8+ T-cell responses to S(wt) and S(Delta) peptides are similar. Both CD4+  
363 (A) and CD8+ (B) T cells show similar levels of interferon- $\gamma$  (IFN- $\gamma$ ) production in ICS in response  
364 to either S(wt) or S(Delta) sequence peptides. For both T-cell types, the greatest responses were  
365 seen with SASA S > AdS+N vaccination. Statistical analyses performed using one-way ANOVA  
366 and Tukey's post-hoc comparison of all groups to all other groups; where \*p  $\leq$  0.05 and \*\*p <  
367 0.01. Data graphed as the mean and SEM. The legend in A applies to all figure panels.  
368

369 **Numbers of IFN- $\gamma$ -secreting splenocytes were the highest from mice receiving SASA S >**

370 **AdS+N heterologous vaccination**

371 As shown in Figure 7A, ELISpot detection of cytokine secretion in response to the S peptide  
372 pool revealed that animals receiving heterologous SASA S > AdS+ N vaccination developed  
373 significantly higher levels of S peptide-reactive IFN- $\gamma$ -secreting T cells than all other groups  
374 except the SASA S homologous group (which had a lower mean). Numbers of IFN- $\gamma$ -secreting T  
375 cells in response to the N peptide pool were similar for AdS+N homologous and SASA S > AdS+N  
376 groups. T cells from SASA S > SASA S group animals did not secrete IFN- $\gamma$  in response to the N  
377 peptide pool, as expected, because the SASA S vaccine does not deliver the N antigen. While the  
378 difference was not significant due to individual variation, the mean number of N-reactive

379 stimulated cells secreting IFN- $\gamma$  due to AdS+N > SASA S vaccination was lower than the other  
 380 groups receiving a vaccine with N.

381 Induction of interleukin-4 (IL-4) secreting T cells was low for all animals in all groups (Fig.  
 382 7B), therefore the IFN- $\gamma$ /IL-4 ratio was above 1 for all animals for which the ratio could be  
 383 calculated (Fig. 7C), reflecting the Th1-bias of all T-cell responses.

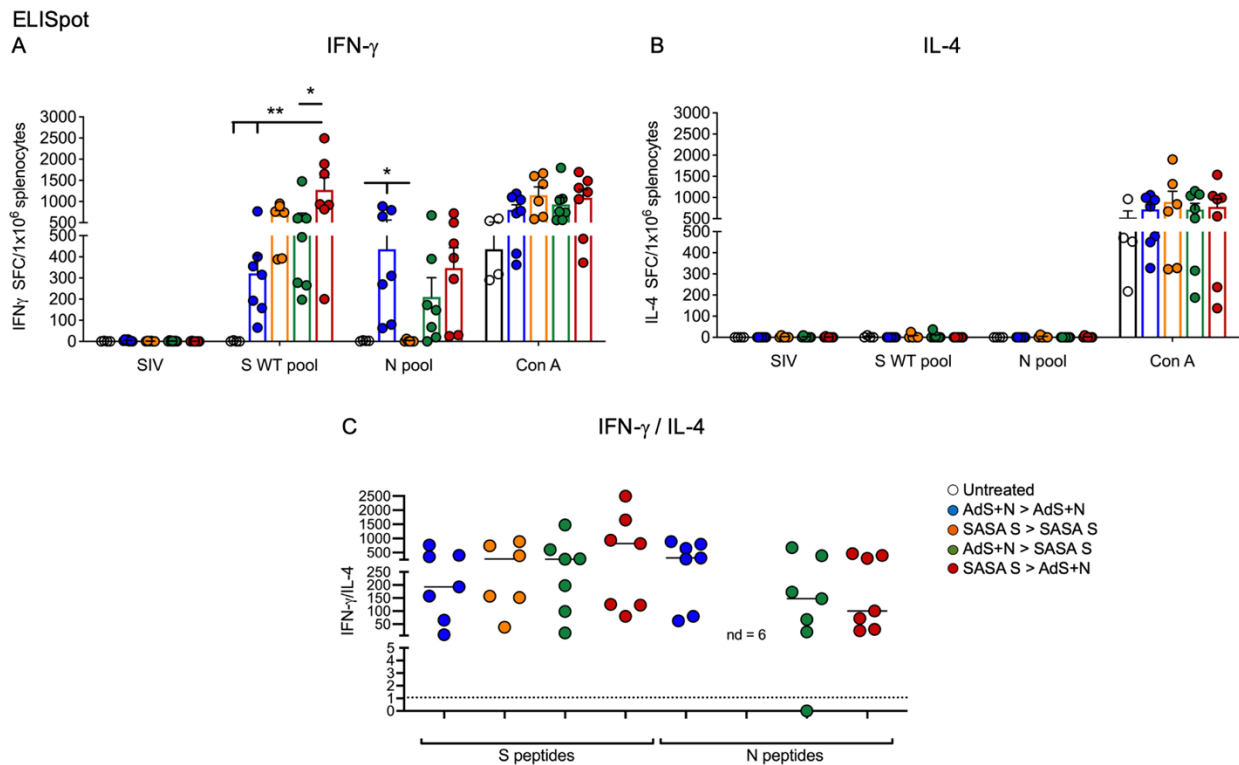

384 **Fig. 7 Heterologous vaccination increases T-cell cytokine secretion in ELISpot.** (A) Numbers of  
 385 interferon- $\gamma$  (IFN- $\gamma$ ) and (B) interleukin-4 (IL-4) secreting T cells in response to S WT and N  
 386 peptides pools. (C) The IFN- $\gamma$ /IL-4 ratio; value of 1 indicated by dashed line. The ratio was not  
 387 determined (ND) for animals with very low IL-4 secretion. Statistical analyses performed using  
 388 one-way ANOVA and Tukey's post-hoc comparison of all groups to all other groups where \*p  $\leq$   
 389 0.05 and \*\*p < 0.01. Data graphed as the mean and SEM. The legend in C applies to all figure  
 390 panels.  
 391

392  
 393 **Sera from mice receiving the SASA S vaccine neutralize Wuhan, Delta, and Beta**  
 394 **pseudoviruses**

395 Sera from the homologous SASA S group and both heterologously vaccinated groups  
 396 neutralized Wuhan (D614G), Delta (B.1.617.2), and Beta (B.1.351) pseudoviruses, as shown in

397 Figure 8. Sera from AdS+N homologous mice showed lower neutralization capability for all  
398 strains. Neutralization of Wuhan strain pseudovirus by sera from SASA S homologous and SASA  
399 S > AdS+N heterologous group mice was significantly greater than that from AdS+N > SASA S  
400 mice, but there were no statistical differences among these 3 groups for the Delta or Beta strains.

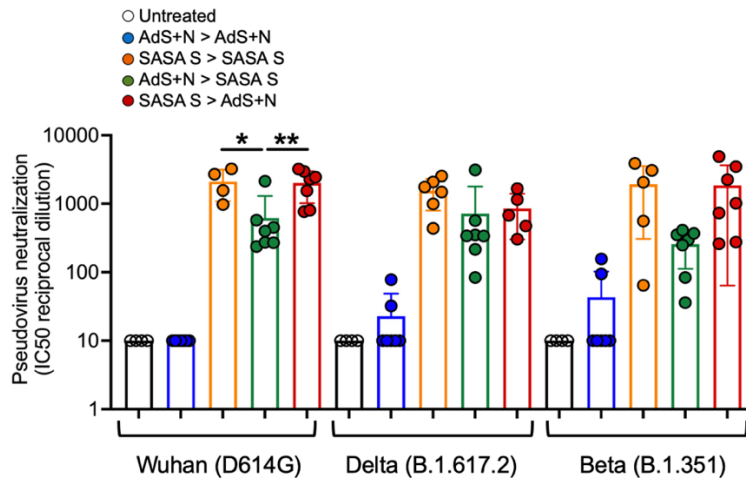

401 **Fig. 8** Sera from SASA S > AdS+N heterologously vaccinated mice neutralizes Wuhan, Delta, and  
402 Beta strain SARS-CoV-2 pseudovirus. Neutralization of Wuhan strain pseudovirus by sera from  
403 SASA S homologous and SASA S > AdS+N mice was significantly greater than that for AdS+N  
404 > SASA S mice (as well as untreated and AdS+N homologous). There were no significant  
405 differences between the SASA S homologous and the two heterologous groups for the Delta or  
406 Beta strain pseudoviruses. Statistical comparison of IC50 values for untreated and AdS+N  
407 homologous group mice with all/many values < the LOD was not performed. Statistical analyses  
408 performed using one-way ANOVA and Tukey's post-hoc comparison of SASA S homologous,  
409 AdS+N > SASA S, and SASA S > AdS+N groups to each other for each strain where \* $p \leq 0.05$   
410 and \*\* $p < 0.01$ ; and for the same group for each different strain. Data graphed as the mean and  
411 SEM.  
412

## 413 DISCUSSION

415 The immune responses observed in the present study support our hypothesis that heterologous  
416 vaccination provides an opportunity for increased humoral and cell-mediated responses. These  
417 results and hypothesis are consistent with recently-published data supporting enhanced antibody  
418 responses in patients who received heterologous vaccination with the currently-FDA authorized  
419 COVID-19 vaccines.<sup>35</sup> Delivery of the SASA S vaccine elicited higher anti-S IgG than the AdS+N  
420 vaccine, but the AdS+N vaccine provided the N antigen that broadened humoral responses and

421 thus the potential to enhance protection against future SARS-CoV-2 variants of concern that could  
422 emerge. We note that mean anti-N IgG responses, while not statistically different among groups  
423 that received the N antigen (not SASA S homologous) were, as predicted, highest with  
424 homologous AdS+N vaccination.

425 Perhaps the most striking finding in the present study are the enhanced responses of S-specific  
426 CD4+ and CD8+ T-cells in SASA S > AdS+N group mice, an effect that was most pronounced  
427 for CD8+ T cells. The similarity of responses of CD4+ and CD8+ T cells to either S(wt) or S(Delta)  
428 suggest this vaccine regimen has a high probability of conferring T-cell mediated protection  
429 against the highly transmissible Delta variant in addition to humoral protection.

430 Immune responses elicited by SASA S > AdS+N vaccination were consistently the highest of  
431 the groups tested (although not always significantly so) and we hypothesize that because the SASA  
432 S vaccines elicits the greatest humoral response to S when given in any order – possibly reaching  
433 the upper detection limit for our ELISA - it enhances CD4+ T-cell activation as these are closely  
434 related to humoral/B cell responses. Therefore, CD4+ T-cell activation might be expected to be  
435 higher after a boost if there are stronger pre-existing, prime-induced B cell responses, that is, when  
436 SASA S is the prime. Adenovirus vectors such as that used for the AdS+N vaccine are good at  
437 eliciting CD8+ T-cell responses, which we posit explains why CD8+ T-cell responses are only  
438 slightly lower for homologous AdS+N vaccination (despite antibody and CD4+ T-cell responses  
439 being lower), as compared to heterologous vaccination. CD8+ T-cell responses likely also benefit  
440 from more robust pre-existing CD4+ T-cell and B cell responses, a condition that exists most  
441 prominently when the SASA S vaccine is given as the prime. Effectively, enhanced CD4+-specific  
442 T-helper responses seen with SASA S prime dosing might have provided conditions for the

443 enhanced CD8+ specific response upon AdS+N boost. The confirmation of this hypothesis awaits  
444 further investigation.

445       Importantly, all of the vaccination regimens that included the SASA S vaccine neutralized  
446 pseudovirus effectively, reflecting the strength of humoral responses to the SASA S vaccine. This  
447 does not however indicate that the predominantly T-cell inducing AdS+N vaccine would not be  
448 effective in an *in vivo* model of SARS-CoV-2 challenge; in fact, we have previously reported that  
449 homologous AdS+N prime-boost vaccination of non-human primates confers protection against  
450 viral challenge <sup>6</sup>. In the *in vivo* viral challenge testing paradigm, cell-mediated immunity (not  
451 accessed in the pseudovirus assay) conferred by AdS+N vaccination likely plays a key role in  
452 protection, as has been reported for natural infection of patients. <sup>36-39</sup>

453       The findings here, including cross-reactive humoral and T-cell responses to S Delta and - for  
454 regimens including SASA S – neutralization of Wuhan, Delta, and Beta pseudovirus, support  
455 ongoing studies of heterologous vaccination with the SASA S and AdS+N vaccines. Further  
456 testing in pre-clinical models of SARS-CoV-2 challenge and clinical trials should be conducted to  
457 assess the capability of this vaccine regimen to provide increased protection against COVID-19  
458 and SARS-CoV-2 variants by combining the ability of SASA S to elicit vigorous humoral  
459 responses with AdS+N's second, highly antigenic N antigen and T-cell response enhancement.

460

461

462

463

464

465

## 466 REFERENCES

- 467 1. Polack FP, Thomas SJ, Kitchin N, et al: Safety and Efficacy of the BNT162b2 mRNA  
468 Covid-19 Vaccine. *N Engl J Med* 383:2603-2615, 2020
- 469 2. Ewer KJ, Barrett JR, Belij-Rammerstorfer S, et al: T cell and antibody responses  
470 induced by a single dose of ChAdOx1 nCoV-19 (AZD1222) vaccine in a phase 1/2 clinical trial.  
471 *Nat Med* 27:270-278, 2021
- 472 3. Shinde V, Bhikha S, Hoosain Z, et al: Efficacy of NVX-CoV2373 Covid-19 Vaccine  
473 against the B.1.351 Variant. *N Engl J Med* 384:1899-1909, 2021
- 474 4. Sadoff J, Gray G, Vandebosch A, et al: Safety and Efficacy of Single-Dose  
475 Ad26.COV2.S Vaccine against Covid-19. *N Engl J Med* 384:2187-2201, 2021
- 476 5. Voysey M, Clemens SAC, Madhi SA, et al: Safety and efficacy of the ChAdOx1  
477 nCoV-19 vaccine (AZD1222) against SARS-CoV-2: an interim analysis of four randomised  
478 controlled trials in Brazil, South Africa, and the UK. *The Lancet* 397:99-111, 2021
- 479 6. Gabitzsch E, Safrit JT, Verma M, et al: Dual-Antigen COVID-19 Vaccine  
480 Subcutaneous Prime Delivery With Oral Boosts Protects NHP Against SARS-CoV-2 Challenge.  
481 *Front Immunol* 12:10.3389/fimmu.2021.729837, 2021
- 482 7. Rice A, Verma M, Shin A, et al: Intranasal plus subcutaneous prime vaccination  
483 with a dual antigen COVID-19 vaccine elicits T-cell and antibody responses in mice. *Sci Rep*  
484 11:14917, 2021
- 485 8. Sieling P, King T, Wong R, et al: Prime hAd5 Spike plus Nucleocapsid Vaccination  
486 Induces Ten-Fold Increases in Mean T-Cell Responses in Phase 1 Subjects that are Sustained  
487 Against Spike Variants. *medRxiv* 2021.04.05.21254940, 2021
- 488 9. Niazi KR, Ochoa M-T, Sieling PA, et al: Activation of human CD4+ T cells by  
489 targeting MHC class II epitopes to endosomal compartments using human CD1 tail sequences.  
490 *Immunology* 122:522-531, 2007
- 491 10. Lin KY, Guarnieri FG, Staveley-O'Carroll KF, et al: Treatment of established  
492 tumors with a novel vaccine that enhances major histocompatibility class II presentation of  
493 tumor antigen. *Cancer Res* 56:21-6, 1996
- 494 11. Wu TC, Guarnieri FG, Staveley-O'Carroll KF, et al: Engineering an intracellular  
495 pathway for major histocompatibility complex class II presentation of antigens. *Proc Natl Acad*  
496 *Sci USA* 92:11671-5, 1995
- 497 12. Voigt EA, Gerhardt A, Hanson D, et al: A long-term thermostable self-amplifying  
498 RNA vaccine against COVID-19. Manuscript in preparation, 2021
- 499 13. Spencer AJ, McKay PF, Belij-Rammerstorfer S, et al: Heterologous vaccination  
500 regimens with self-amplifying RNA and adenoviral COVID vaccines induce robust immune  
501 responses in mice. *Nat Commun* 12:2893, 2021
- 502 14. Wu L, Kong WP, Nabel GJ: Enhanced breadth of CD4 T-cell immunity by DNA  
503 prime and adenovirus boost immunization to human immunodeficiency virus Env and Gag  
504 immunogens. *J Virol* 79:8024-31, 2005
- 505 15. Casper C: New Technologies for Accessible, Durable and Broadly Protective  
506 Coronavirus Vaccines IDRI [http://www.idri.org/wp-content/uploads/2021/04/IDRI-](http://www.idri.org/wp-content/uploads/2021/04/IDRI-Technologies_Coronavirus.pdf)  
507 [Technologies\\_Coronavirus.pdf:1-15](http://www.idri.org/wp-content/uploads/2021/04/IDRI-Technologies_Coronavirus.pdf), 2021

- 508           16.     Erasmus JH, Khandhar AP, Guderian J, et al: A Nanostructured Lipid Carrier for  
509 Delivery of a Replicating Viral RNA Provides Single, Low-Dose Protection against Zika. *Mol Ther*  
510 26:2507-2522, 2018
- 511           17.     Bloom K, van den Berg F, Arbuthnot P: Self-amplifying RNA vaccines for  
512 infectious diseases. *Gene therapy* 28:117-129, 2021
- 513           18.     Sandbrink JB, Shattock RJ: RNA Vaccines: A Suitable Platform for Tackling  
514 Emerging Pandemics? *Front Immunol* 11:10.3389/fimmu.2020.608460, 2020
- 515           19.     Zhang C, Maruggi G, Shan H, et al: Advances in mRNA Vaccines for Infectious  
516 Diseases. *Front Immunol* 10:594, 2019
- 517           20.     Zhang L, Jackson CB, Mou H, et al: SARS-CoV-2 spike-protein D614G mutation  
518 increases virion spike density and infectivity. *Nat Commun* 11:6013, 2020
- 519           21.     Weissman D, Alameh M-G, de Silva T, et al: D614G Spike Mutation Increases  
520 SARS CoV-2 Susceptibility to Neutralization. *Cell host & microbe* 29:23-31.e4, 2021
- 521           22.     Kirchdoerfer RN, Wang N, Pallesen J, et al: Stabilized coronavirus spikes are  
522 resistant to conformational changes induced by receptor recognition or proteolysis. *Sci Rep*  
523 8:15701-15701, 2018
- 524           23.     Bangaru S, Ozorowski G, Turner HL, et al: Structural analysis of full-length SARS-  
525 CoV-2 spike protein from an advanced vaccine candidate. *Science* 370:1089-1094, 2020
- 526           24.     van Doremalen N, Lambe T, Spencer A, et al: ChAdOx1 nCoV-19 vaccine prevents  
527 SARS-CoV-2 pneumonia in rhesus macaques. *Nature* 586:578-582, 2020
- 528           25.     Zhu F-C, Li Y-H, Guan X-H, et al: Safety, tolerability, and immunogenicity of a  
529 recombinant adenovirus type-5 vectored COVID-19 vaccine: a dose-escalation, open-label, non-  
530 randomised, first-in-human trial. *The Lancet* 395:1845-1854
- 531           26.     Amalfitano A, Begy CR, Chamberlain JS: Improved adenovirus packaging cell lines  
532 to support the growth of replication-defective gene-delivery vectors. *Proc Natl Acad Sci USA*  
533 93:3352-3356, 1996
- 534           27.     Amalfitano A, Chamberlain JS: Isolation and characterization of packaging cell  
535 lines that coexpress the adenovirus E1, DNA polymerase, and preterminal proteins: implications  
536 for gene therapy. *Gene Ther* 4:258-63, 1997
- 537           28.     Amalfitano A, Hauser MA, Hu H, et al: Production and Characterization of  
538 Improved Adenovirus Vectors with the E1, E2b, and E3 Genes Deleted. *J Virol* 72:926, 1998
- 539           29.     Seregin SS, Amalfitano A: Overcoming pre-existing adenovirus immunity by  
540 genetic engineering of adenovirus-based vectors. *Expert Opin Biol Ther* 9:1521-31, 2009
- 541           30.     Voigt EA, Fuerte-Stone J, Granger B, et al: Live-attenuated RNA hybrid vaccine  
542 technology provides single-dose protection against Chikungunya virus. *Mol Ther* 29:2782-2793,  
543 2021
- 544           31.     Erasmus JH, Archer J, Fuerte-Stone J, et al: Intramuscular Delivery of Replicon  
545 RNA Encoding ZIKV-117 Human Monoclonal Antibody Protects against Zika Virus Infection. *Mol*  
546 *Ther Methods Clin Dev* 18:402-414, 2020
- 547           32.     Gerhardt A, Voigt E, Archer M, et al: A Thermostable, Flexible RNA Vaccine  
548 Delivery Platform for Pandemic Response. *bioRxiv:2021.02.01.429283*, 2021
- 549           33.     Skordos I, Demeyer A, Beyaert R: Analysis of T cells in mouse lymphoid tissue and  
550 blood with flow cytometry. *STAR protocols* 2:100351-100351, 2021



- 551           34.     Crawford KHD, Eguia R, Dingens AS, et al: Protocol and Reagents for  
552 Pseudotyping Lentiviral Particles with SARS-CoV-2 Spike Protein for Neutralization Assays.  
553 *Viruses* 12:513, 2020
- 554           35.     Atmar RL, Lyke KE, Deming ME, et al: Heterologous SARS-CoV-2 Booster  
555 Vaccinations – Preliminary Report. medRxiv:2021.10.10.21264827, 2021
- 556           36.     Grifoni A, Sidney J, Vita R, et al: SARS-CoV-2 human T cell epitopes: Adaptive  
557 immune response against COVID-19. *Cell Host Microbe* 29:1076-1092, 2021
- 558           37.     Tarke A, Sidney J, Kidd CK, et al: Comprehensive analysis of T cell  
559 immunodominance and immunoprevalence of SARS-CoV-2 epitopes in COVID-19 cases. *Cell Rep*  
560 *Med* 2:100204, 2021
- 561           38.     Sekine T, Perez-Potti A, Rivera-Ballesteros O, et al: Robust T cell immunity in  
562 convalescent individuals with asymptomatic or mild COVID-19. *Cell* 183:158, 2020
- 563           39.     Tan AT, Linster M, Tan CW, et al: Early induction of functional SARS-CoV-2-  
564 specific T cells associates with rapid viral clearance and mild disease in COVID-19 patients. *Cell*  
565 *Rep* 34:108728, 2021
- 566
